# Supplementary material for: CO2 hydrogenation to higher hydrocarbons on K/Fe–Al–O spinel catalysts promoted with Si, Ti, Zr, Hf, Mn and Ce
Source: Royal Society of Chemistry journal article supplement (doi:10.1039/c7cy01118k), 2017-01-01
Supplement: c7cy01118k1.pdf [file c7cy01118k1.pdf]

### Supporting Information

#### **CO<sub>2</sub> hydrogenation to higher hydrocarbons on K/Fe-Al-O spinel catalysts promoted with Si, Ti, Zr, Hf, Mn and Ce**

A. Samanta, M.V. Landau\*, R. Vidruk-Nehemya and M. Herskowitz

Chemical Engineering Department, Blechner Center for Industrial Catalysis and Process Development, Ben-Gurion University of the Negev, Beer-Sheva, 84105, Israel

\*To whom correspondence should be addressed: Prof. M.V. Landau (e-mail:

[mlandau@bgu.ac.il](mailto:mlandau@bgu.ac.il))

**Table S1.** Performance of carburized K/ Fe-Al-O spinel based catalysts in CO<sub>2</sub> hydrogenation. (T=320°C, (H<sub>2</sub>/CO<sub>2</sub>)<sub>in</sub> = 3, P<sub>total</sub> = 20 bar, WHSV<sub>CO<sub>2</sub></sub> = 3 h<sup>-1</sup>)

| Catalyst                             | CO <sub>2</sub><br>conversion,<br>(%) | Selectivity, % |                 |                                |                                                                  |                  |                                   |
|--------------------------------------|---------------------------------------|----------------|-----------------|--------------------------------|------------------------------------------------------------------|------------------|-----------------------------------|
|                                      |                                       | CO             | CH <sub>4</sub> | C <sub>2</sub> -C <sub>4</sub> | C <sub>2</sub> -C <sub>4</sub><br>olefins/<br>paraffins<br>ratio | C <sub>5</sub> + | C <sub>7</sub> +/C <sub>5</sub> + |
| SP                                   | 34                                    | 16             | 12              | 25                             | 7.4                                                              | 39               | 0.48                              |
| SP-SiO <sub>2</sub> -5               | 37                                    | 27             | 23              | 27                             | 5.3                                                              | 16               | 0                                 |
| SP-SiO <sub>2</sub> -15              | 25                                    | 59             | 26              | 6                              | 1.3                                                              | 1                | 0                                 |
| SP-TiO <sub>2</sub> -5               | 45                                    | 8              | 17              | 34                             | 6.5                                                              | 32               | 0.43                              |
| SP-TiO <sub>2</sub> -20              | 51                                    | 10             | 26              | 39                             | 2.45                                                             | 17               | 0.32                              |
| SP-ZrO <sub>2</sub> -5               | 50                                    | 4              | 18              | 37                             | 5.2                                                              | 32               | 0.55                              |
| SP-ZrO <sub>2</sub> -20              | 45                                    | 7              | 12              | 32                             | 6.2                                                              | 42               | 0.63                              |
| SP-CeO <sub>2</sub> -5               | 35                                    | 18             | 22              | 35                             | 3.6                                                              | 18               | 0.17                              |
| SP-MnO-5                             | 36                                    | 13             | 10              | 25                             | 6.8                                                              | 45               | 0.62                              |
| SP-HfO <sub>2</sub> -5               | 30                                    | 19             | 12              | 29                             | 5.6                                                              | 33               | 0.55                              |
| SP-SiO <sub>2</sub> -15 <sup>w</sup> | 18                                    | 60             | 25              | 5                              | 1.4                                                              | 3                | 0                                 |
| SP-ZrO <sub>2</sub> -20 <sup>w</sup> | 40                                    | 8              | 16              | 33                             | 7.4                                                              | 35               | 0.50                              |
| SP <sup>np</sup>                     | 33                                    | 15             | 40              | 30                             | --                                                               | 7                | 0                                 |

*w*-without CTAB

*np* – not promoted with K

**Table S2.** Performance of SP and SP-ZrO<sub>2</sub>-20 in CO<sub>2</sub> hydrogenation conducted in one and three reactors in series (T=320°C, (H<sub>2</sub>/CO<sub>2</sub>)<sub>in</sub> = 3, P<sub>total</sub> = 20 bar)

| Catalyst                | Number of reactors | WHSV <sub>CO<sub>2</sub></sub> , (h <sup>-1</sup> ) | CO <sub>2</sub> conversion, (%) | Selectivity, % |                 |                                |                  |                                   |
|-------------------------|--------------------|-----------------------------------------------------|---------------------------------|----------------|-----------------|--------------------------------|------------------|-----------------------------------|
|                         |                    |                                                     |                                 | CO             | CH <sub>4</sub> | C <sub>2</sub> -C <sub>4</sub> | C <sub>5</sub> + | C <sub>7</sub> +/C <sub>5</sub> + |
| SP                      | 1                  | 3                                                   | 34                              | 16             | 12              | 25                             | 39               | 0.48                              |
|                         | 3                  | 3                                                   | 57                              | 14             | 12              | 26                             | 41               | 0.70                              |
|                         | 3                  | 1                                                   | 73                              | 8              | 13              | 29                             | 42               | 0.78                              |
| SP-ZrO <sub>2</sub> -20 | 1                  | 3                                                   | 45                              | 7              | 12              | 32                             | 41               | 0.63                              |
|                         | 3                  | 3                                                   | 70                              | 6              | 13              | 31                             | 42               | 0.83                              |
|                         | 3                  | 1                                                   | 90                              | 4              | 12              | 33                             | 43               | 0.81                              |

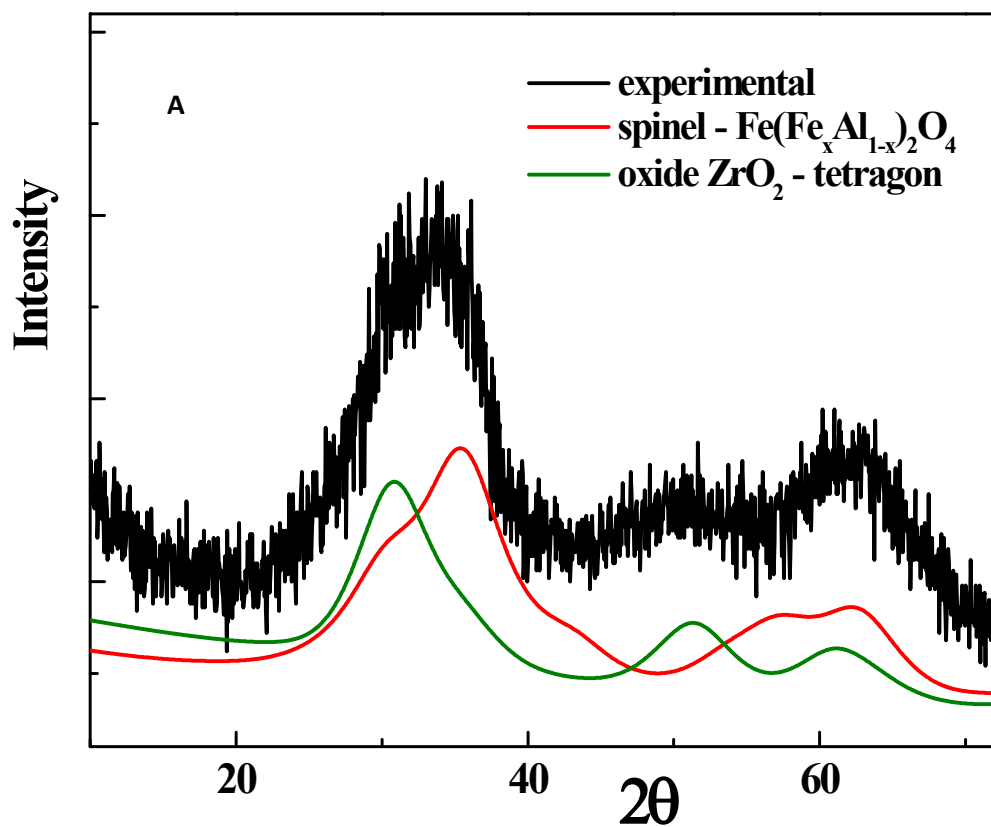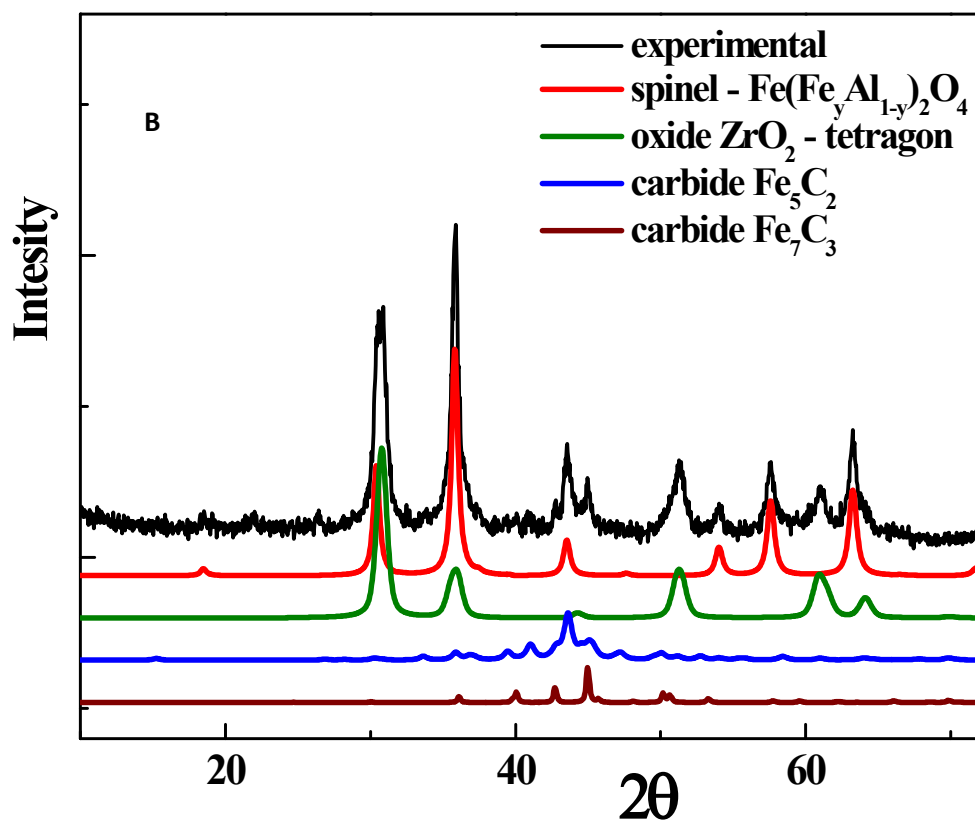

**Figure S1.** XRD patterns of catalyst SP-ZrO<sub>2</sub>-20: experimental envelop and deconvolution of components diffractograms using Rietveld software: A – as synthesized; B- after activation and testing.

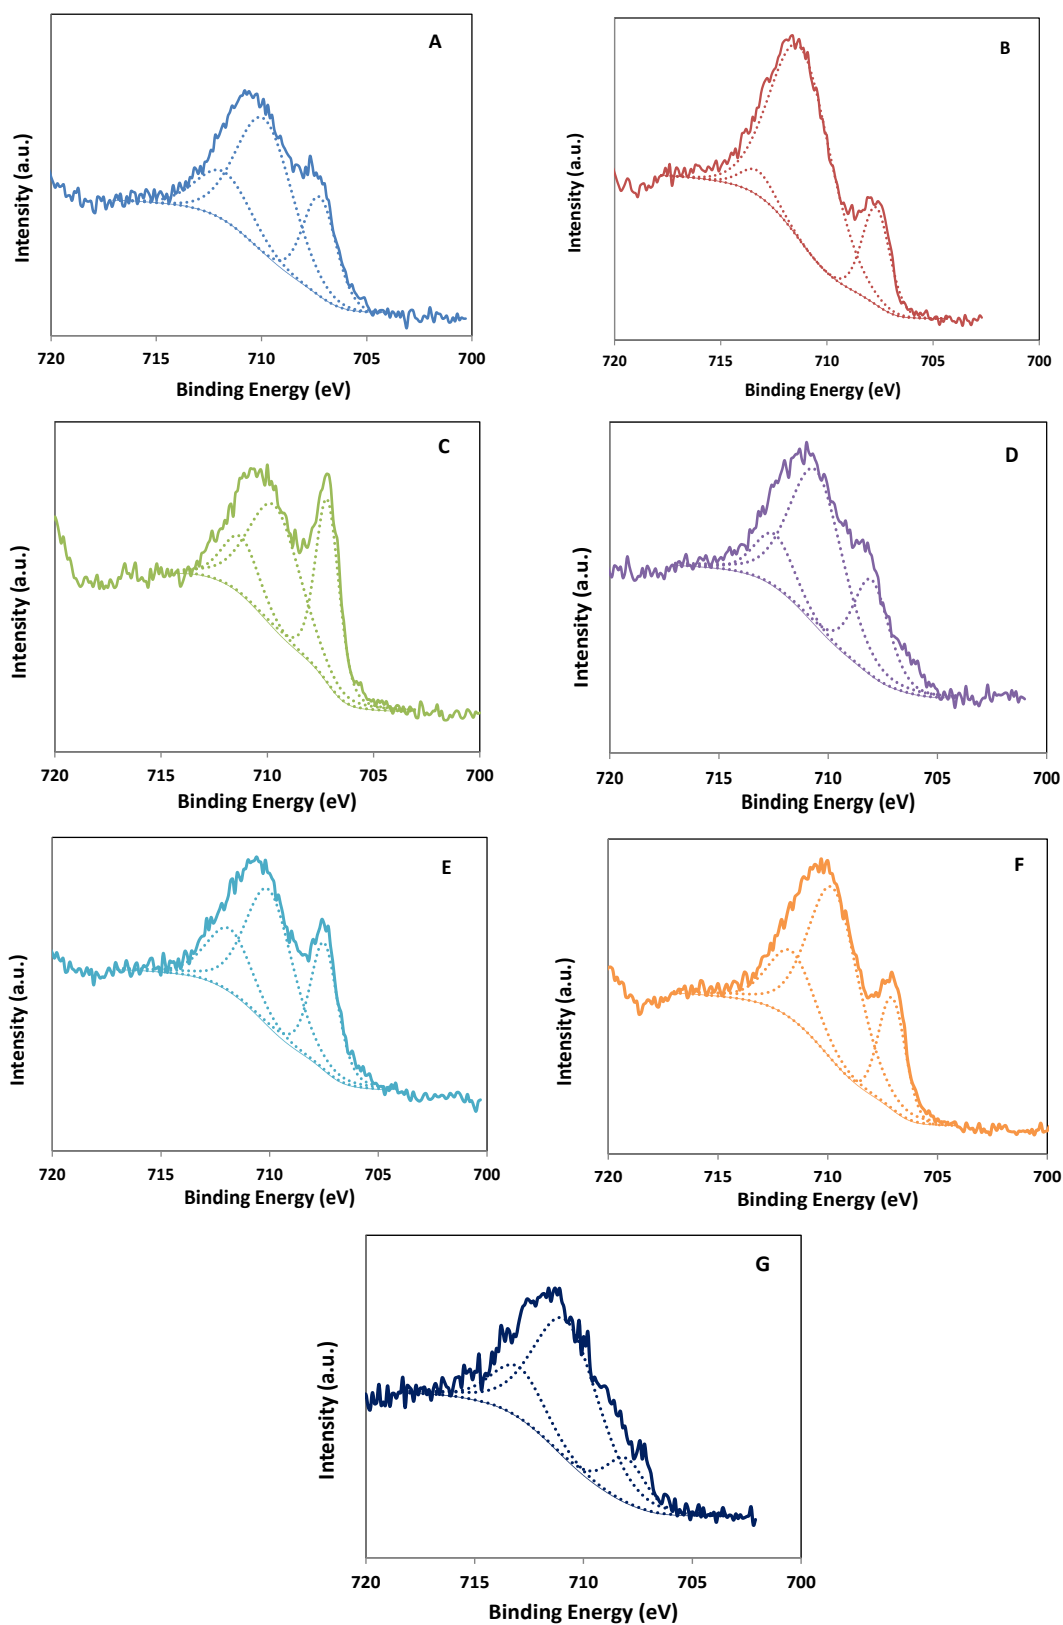

**Figure S2.** XPS Fe $2p_{3/2}$  profiles recorded with tested SP-based materials: A – SP; B – SP-SiO<sub>2</sub>-15; C - SP-TiO<sub>2</sub>-20; D – SP-ZrO<sub>2</sub>-20; E – SP-CeO<sub>2</sub>-5; F– SP-MnO-5; G– SP-HfO<sub>2</sub>-5.
